# Supplementary material
Source: PubMed Central journal article supplement (PMC2966286)
Supplement: NIHMS236982-supplement-Supplemental_materials.pdf [file NIHMS236982-supplement-Supplemental_materials.pdf]

**Supplementary Material for : Bayesian On-line  
Learning of the Hazard Rate in Change-Point  
Problems**

**Robert C. Wilson**

Department of Psychology, Green Hall,  
Princeton University, Princeton, NJ 08540, USA

**Matthew R. Nassar and Joshua I. Gold**

Department of Neuroscience, 116 Johnson Pavilion,  
University of Pennsylvania, Philadelphia, PA 19104, USA

May 24, 2010

# 1 Exponential families

The methods used in this paper are particularly useful when the generating distribution comes from the exponential family. These distributions are completely specified in terms of a finite number of sufficient statistics,  $\eta$ , and can be written in the form:

$$p(\mathbf{x}|\eta) = H(\mathbf{x}) \exp(\eta^T \mathbf{U}(\mathbf{x}) - A(\eta)) \quad (1)$$

where  $A(\eta)$  is given by

$$A(\eta) = \log \left\{ \int H(\mathbf{x}) \exp(\eta^T \mathbf{U}(\mathbf{x})) d\mathbf{x} \right\} \quad (2)$$

Exponential family distributions are particularly convenient because the conjugate prior is also a member of this family, taking the form

$$p(\eta|\chi_0, v) = \tilde{H}(\eta) \exp(\eta^T \chi_0 - vA(\eta) - \tilde{A}(\chi_0, v)) \quad (3)$$

where  $\chi_0$  and  $v$  are the prior hyperparameters. Thus, we can write the posterior distribution for run length  $r_t$  as

$$\begin{aligned} p(\mathbf{x}_{t+1}|\mathbf{x}_t^{(r_t)}) &= \int p(\mathbf{x}_{t+1}|\eta)p(\eta|\mathbf{x}_t^r)d\eta \\ &= \frac{\int \prod_{i=t-r_t}^{t+1} p(\mathbf{x}_i|\eta)p(\eta|\chi_0, v)d\eta}{\int \prod_{i=t-r_t}^t p(\mathbf{x}_i|\eta)p(\eta|\chi_0, v)d\eta} \\ &= H(\mathbf{x}_{t+1}) \frac{\int \tilde{H}(\eta) \exp(\eta^T (\chi_0 + \sum_{i=t-r_t}^{t+1} \mathbf{U}(\mathbf{x}_i)) - (r_t + v + 1)A(\eta)) d\eta}{\int \tilde{H}(\eta) \exp(\eta^T (\chi_0 + \sum_{i=t-r_t}^t \mathbf{U}(\mathbf{x}_i)) - (r_t + v + 1)A(\eta)) d\eta} \end{aligned} \quad (4)$$

and therefore only have to keep track of a finite number of sufficient statistics; i.e.,

$$\chi_t = \chi_0 + \sum_{i=t-r_t}^{t+1} \mathbf{U}(\mathbf{x}_i) \quad (5)$$

and

$$v_t = v_0 + r_t \quad (6)$$

for each run length to fully specify the distribution.

## 2 Update algorithm for general change-point hierarchy

To derive the message-passing algorithm for the most general case, we first must introduce a suitable notation. We define  $a_0^{(n)}$  and  $b_0^{(n)}$  as the prior parameters of the beta distributions over the hazard rate in the  $n$ th layer of the hierarchy, and  $(a_t^{(n)} - a_0^{(n)})$  and  $(b_t^{(n)} - b_0^{(n)})$  to describe the number of change-points and non-change-points counted in each layer. We then group these together as vectors

$$\mathbf{a}_t = \left[ a_t^{(1)}, a_t^{(2)}, \dots, a_t^{(N-1)} \right] \quad \text{and} \quad \mathbf{b}_t = \left[ b_t^{(1)}, b_t^{(2)}, \dots, b_t^{(N-1)} \right] \quad (7)$$

to further simplify the notation. Similarly, we define  $\mathbf{h}_t$  as

$$\mathbf{h}_t = \left[ h_t^{(1)}, h_t^{(2)}, \dots, h_t^{(N-1)} \right] \quad (8)$$

But note that it is more convenient not to include  $h^{(0)}$  in this vector. In this notation, then, we have

$$p(\mathbf{x}_{t+1} | \mathbf{x}_{1:t}) = \sum_{r_t} \sum_{\mathbf{a}_t} \sum_{\mathbf{b}_t} p(\mathbf{x}_{t+1} | \mathbf{x}_{1:t}) p(r_t, \mathbf{a}_t, \mathbf{b}_t, \mathbf{x}_{1:t}) \quad (9)$$

In a similar manner to before we can compute  $p(r_t, \mathbf{a}_t, \mathbf{b}_t, \mathbf{x}_{1:t})$  recursively; i.e.,

$$\begin{aligned} p(r_t, \mathbf{a}_t, \mathbf{b}_t, \mathbf{x}_{1:t}) &= \sum_{r_{t-1}} \sum_{\mathbf{a}_{t-1}} \sum_{\mathbf{b}_{t-1}} p(r_t, r_{t-1}, \mathbf{a}_t, \mathbf{a}_{t-1}, \mathbf{b}_t, \mathbf{b}_{t-1}, \mathbf{x}_{1:t}) \\ &= \sum_{r_{t-1}} \sum_{\mathbf{a}_{t-1}} \sum_{\mathbf{b}_{t-1}} p(r_t, \mathbf{a}_t, \mathbf{b}_t, \mathbf{x}_t | r_{t-1}, \mathbf{a}_{t-1}, \mathbf{b}_{t-1}, \mathbf{x}_{1:t-1}) p(r_{t-1}, \mathbf{a}_{t-1}, \mathbf{b}_{t-1}, \mathbf{x}_{1:t-1}) \\ &= \sum_{r_{t-1}} \sum_{\mathbf{a}_{t-1}} \sum_{\mathbf{b}_{t-1}} p(r_t, \mathbf{a}_t, \mathbf{b}_t | r_{t-1}, \mathbf{a}_{t-1}, \mathbf{b}_{t-1}) p(\mathbf{x}_t | \mathbf{x}_{t-1}^{(r_t)}) p(r_{t-1}, \mathbf{a}_{t-1}, \mathbf{b}_{t-1}, \mathbf{x}_{1:t-1}) \end{aligned} \quad (10)$$

To get a handle on the change-point prior, we can write it as the marginal over  $\mathbf{h}_t$ , i.e.

$$p(r_t, \mathbf{a}_t, \mathbf{b}_t | r_{t-1}, \mathbf{a}_{t-1}, \mathbf{b}_{t-1}) = \int p(r_t, \mathbf{a}_t, \mathbf{b}_t | \mathbf{h}_t, r_{t-1}, \mathbf{a}_{t-1}, \mathbf{b}_{t-1}) p(\mathbf{h}_t | r_{t-1}, \mathbf{a}_{t-1}, \mathbf{b}_{t-1}) d\mathbf{h}_t \quad (11)$$

where the integral is over the interval  $[0, 1]$  in each dimension and

$$p(\mathbf{h}_t | r_{t-1}, \mathbf{a}_{t-1}, \mathbf{b}_{t-1}) = \prod_{n=1}^{N-1} \frac{\Gamma(a_{t-1}^{(n)} + 1) \Gamma(b_{t-1}^{(n)} + 1)}{\Gamma(a_{t-1}^{(n)} + b_{t-1}^{(n)} + 1)} \left( h_t^{(n)} \right)^{a_{t-1}^{(n)}} \left( 1 - h_t^{(n)} \right)^{b_{t-1}^{(n)}} \quad (12)$$

To understand  $p(r_t, \mathbf{a}_t, \mathbf{b}_t | \mathbf{h}_t, r_{t-1}, \mathbf{a}_{t-1}, \mathbf{b}_{t-1})$ , we note that there are only  $2^{N-1}$  non-zero entries, corresponding to the number of possibilities arising from allowing each of the  $N$  levels of the hierarchy to have a change-point or not. Then, for a particular possibility,  $i$ , we define  $\mathcal{C}_i$  as the set of all levels experiencing a change-point and  $\bar{\mathcal{C}}_i$  as the set of levels not experiencing a change-point. Thus we can write

$$p(r_t, \mathbf{a}_t, \mathbf{b}_t | \mathbf{h}_t, r_{t-1}, \mathbf{a}_{t-1}, \mathbf{b}_{t-1}) = \sum_{i=1}^{2^N} \delta(r_t - R(r_{t-1}, \mathcal{C}_i)) \delta(\mathbf{a}_t - \mathbf{A}(\mathbf{a}_{t-1}, \mathcal{C}_i)) \delta(\mathbf{b}_t - \mathbf{B}(\mathbf{b}_{t-1}, \mathcal{C}_i)) \prod_{m \in \mathcal{C}_i} h_t^{(m)} \prod_{n \in \bar{\mathcal{C}}_i} (1 - h_t^{(n)}) \quad (13)$$

where

$$R(r_{t-1}, \mathcal{C}_i) = \begin{cases} 0 & \text{if level } N \in \mathcal{C}_i \\ r_{t-1} + 1 & \text{if level } N \notin \mathcal{C}_i \end{cases} \quad (14)$$

$$A_n(\mathbf{a}_{t-1}, \mathcal{C}_i) = \begin{cases} 0 & \text{if level } n \in \mathcal{C}_i \\ a_{t-1}^{(n)} & \text{if level } n \notin \mathcal{C}_i \text{ and level } n+1 \notin \mathcal{C}_i \\ a_{t-1}^{(n)} + 1 & \text{if level } n \notin \mathcal{C}_i \text{ and level } n+1 \in \mathcal{C}_i \end{cases} \quad (15)$$

$$B_n(\mathbf{b}_{t-1}, \mathcal{C}_i) = \begin{cases} 0 & \text{if level } n \in \mathcal{C}_i \\ b_{t-1}^{(n)} + 1 & \text{if level } n \notin \mathcal{C}_i \text{ and level } n+1 \notin \mathcal{C}_i \\ b_{t-1}^{(n)} & \text{if level } n \notin \mathcal{C}_i \text{ and level } n+1 \in \mathcal{C}_i \end{cases} \quad (16)$$

which leads to the following expression for the change-point prior

$$p(r_t, \mathbf{a}_t, \mathbf{b}_t | r_{t-1}, \mathbf{a}_{t-1}, \mathbf{b}_{t-1}) = \sum_{i=1}^{2^N} \delta(r_t - R(r_{t-1}, \mathcal{C}_i)) \delta(\mathbf{a}_t - \mathbf{A}(\mathbf{a}_{t-1}, \mathcal{C}_i)) \delta(\mathbf{b}_t - \mathbf{B}(\mathbf{b}_{t-1}, \mathcal{C}_i)) \prod_{m \in \mathcal{C}_i} \tilde{h}_t^{(m)} \prod_{n \in \bar{\mathcal{C}}_i} (1 - \tilde{h}_t^{(n)}) \quad (17)$$

where

$$\tilde{h}_t^{(n)} = \frac{a_{t-1}^{(n)} + 1}{a_{t-1}^{(n)} + b_{t-1}^{(n)} + 2} \quad (18)$$

Thus we have a (fairly) simple message-passing algorithm for inference and prediction in a change-point hierarchy.

### **3 Pseudocode**

In the following two boxes we present pseudocode for inferring a constant hazard rate (box 1) and for inference in a three-level change-point hierarchy (box 2).

1. Initialise node  $\mathcal{N}(r_0, a_0, t = 0)$ :  $w(r_0 = 0, a_0 = 0, t = 1) = 1$  and nodelist:  $\mathcal{L}_{t=0} = \{\mathcal{N}(0, 0, 0)\}$
2. For all other nodes, set initial value of weight to zero,  $w(r_t, a_t, t) = 0$
3. **for** each time  $t = 1$  to  $T_{max}$ 
  4. Set total weight to zero,  $W_{total} = 0$ , and initialise nodelist to empty set,  $\mathcal{L}_t = \emptyset$
  5. **for** all nodes in nodelist  $\mathcal{L}_{t-1}$ 
    6. Observe data  $\mathbf{x}_t$
    7. Compute predictive probability:  $\pi(\mathbf{x}_t) = p(\mathbf{x}_t | \mathbf{x}_{t-1}^{(r_{t-1})})$
    8. Compute estimate of hazard rate:  $\tilde{h}_t = \frac{a_{t-1}+1}{a_{t-1}+b_{t-1}+2}$
    9. Send messages to children:
      - To  $\mathcal{N}(r_t = r_{t-1} + 1, a_t = a_{t-1}, t)$ :  $w(r_t, a_t, t) = (1 - \tilde{h}_{t-1})w(r_{t-1}, a_{t-1}, t - 1)\pi(\mathbf{x}_t)$
      - To  $\mathcal{N}(r_t = 0, a_t = a_{t-1} + 1, t)$ :  $w(r_t, a_t, t) = w(r_t, a_t, t) + \tilde{h}_{t-1}w(r_{t-1}, a_{t-1}, t - 1)\pi(\mathbf{x}_t)$
  10. Add new children to nodelist at time  $t$
  11. Update  $W_{total} = W_{total} + w(r_{t-1}, a_{t-1}, t - 1)\pi(x_t)$
12. **endfor**
13. Normalize: **for** nodes in  $\mathcal{L}_t$ :  $w(r_t, a_t, t) = w(r_t, a_t, t)/W_{total}$ ; **endfor**
14. Predict:  $p(\mathbf{x}_{t+1} | \mathbf{x}_{1:t}) = \sum_{r_t} \sum_{a_t} p(\mathbf{x}_{t+1} | \mathbf{x}_t^{(r_t)})w(r_t, a_t, t)$
15. **endfor**

**Box 1** – Pseudo-code for on-line learning of a constant hazard rate

1. Initialise node  $\mathcal{N}(r_0, a_0, b_0, 0)$ :  $w(r_0 = 0, a_0 = 0, b_0 = 0, t = 0) = 1$  and list:  $\mathcal{L}_{t=0} = \{\mathcal{N}(0, 0, 0, 0)\}$
2. **for** each time  $t = 1$  to  $T_{max}$ 
  3. Initialise new nodelist to empty set,  $\mathcal{L}_t = \emptyset$
  4. **for** all nodes  $\in \mathcal{L}_{t-1}$ 
    5. Observe data  $\mathbf{x}_t$  and compute predictive probability:  $\pi(\mathbf{x}_t) = p(\mathbf{x}_t | \mathbf{x}_{t-1}^{(r_{t-1})})$
    6. Compute estimate of hazard rate:  $\tilde{h}_t^{(1)} = \frac{a_{t-1}+1}{a_{t-1}+b_{t-1}+2}$
    7. Messages to children to update weights by
      - to  $\mathcal{N}(r_t = r_{t-1} + 1, a_t = a_{t-1}, b_t = b_{t-1} + 1, t)$ :  $(1 - \tilde{h}_{t-1}^{(1)})(1 - h^{(0)})w(r_{t-1}, a_{t-1}, b_{t-1}, t - 1)\pi(\mathbf{x}_t)$
      - to  $\mathcal{N}(r_t = 0, a_t = a_{t-1} + 1, b_t = b_{t-1}, t)$ :  $\tilde{h}_{t-1}^{(1)}(1 - h^{(0)})w(r_{t-1}, a_{t-1}, b_{t-1}, t - 1)\pi(\mathbf{x}_t)$
      - to  $\mathcal{N}(r_t = r_{t-1} + 1, a_t = a_0, b_t = b_0, t)$ :  $(1 - \tilde{h}_{t-1}^{(1)})h^{(0)}w(r_{t-1}, a_{t-1}, b_{t-1}, t - 1)\pi(\mathbf{x}_t)$
      - to  $\mathcal{N}(r_t = 0, a_t = a_0, b_t = b_0 + 1, t)$ :  $\tilde{h}_{t-1}^{(1)}h^{(0)}w(r_{t-1}, a_{t-1}, b_{t-1}, t - 1)\pi(\mathbf{x}_t)$
    8. Add new children to nodelist at time  $t$
  9. **endfor**
  10. Prune nodes:  $\mathcal{L}_t = \text{prune}(\mathcal{L}_t)$
  11. Normalize:
 
$$W_{total} = \sum_{\text{nodes} \in \mathcal{L}_t} w(r_t, a_t, b_t, t)$$
    - for** all nodes in  $\mathcal{L}_t$ :  $w(r_t, a_t, b_t, t) = w(r_t, a_t, b_t, t) / W_{total}$ ; **endfor**
  13. Predict:  $p(\mathbf{x}_{t+1} | \mathbf{x}_{1:t}) = \sum_{r_t} \sum_{a_t} \sum_{b_t} p(\mathbf{x}_{t+1} | \mathbf{x}_t^{(r_t)})w(r_t, a_t, b_t, t)$
14. **endfor**

**Box 2** – Pseudo-code for on-line learning of the hazard rate in a three-level change-point hierarchy.
